1 **Title**

2 Evolution of the spatial distribution of alcohol consumption following alcohol control policies: a 25-  
3 year cross-sectional study in a Swiss urban population

4 **Authors**

5 David De Ridder<sup>1,2,3,4</sup>, José Sandoval<sup>2,4</sup>, Rebecca Himsl<sup>1,2</sup>, Pedro Marques Vidal<sup>5</sup>, Silvia Stringhini<sup>2,4</sup>,  
6 Stéphane Joost<sup>1,2,4,6\*</sup>, Idris Guessous<sup>1,2,3,4\*</sup>

7 **Affiliations**

8 <sup>1</sup>Unit of Population Epidemiology, Division of Primary Care Medicine, Department of Primary Care  
9 Medicine, Geneva University Hospitals, Geneva, Switzerland

10 <sup>2</sup>Group of Geographic Information Research and Analysis in Population Health (GIRAPH), Geneva,  
11 Switzerland

12 <sup>3</sup>Laboratory of Geographic Information Systems (LASIG), School of Architecture, Civil and  
13 Environmental Engineering (ENAC), École Polytechnique Fédérale de Lausanne (EPFL), Lausanne,  
14 Switzerland

15 <sup>4</sup>Faculty of Medicine, University of Geneva, Geneva, Switzerland

16 <sup>5</sup>Department of Medicine, Internal Medicine, Lausanne University Hospital, Lausanne, Switzerland

17 <sup>6</sup>La Source, School of Nursing, University of Applied Sciences and Arts Western Switzerland (HES-  
18 SO), Lausanne, Switzerland

19 **Contact information**

20 David De Ridder: [David.DeRidder@unige.ch](mailto:David.DeRidder@unige.ch)

21 José Sandoval: [jose.sandoval@cantab.net](mailto:jose.sandoval@cantab.net)

22 Rebecca Himsl: [Rebecca.Himsl@gmail.com](mailto:Rebecca.Himsl@gmail.com)

23 Pedro Marques-Vidal: [Pedro-Manuel.Marques-Vidal@chuv.ch](mailto:Pedro-Manuel.Marques-Vidal@chuv.ch)

24 Silvia Stringhini: [Silvia.Stringhini@hcuge.ch](mailto:Silvia.Stringhini@hcuge.ch)

25 Stéphane Joost: [Stephane.Joost@epfl.ch](mailto:Stephane.Joost@epfl.ch)

26 Idris Guessous: [Idris.Guessous@hcuge.ch](mailto:Idris.Guessous@hcuge.ch)

27 \* Correspondence: [Idris.Guessous@hcuge.ch](mailto:Idris.Guessous@hcuge.ch), T.+41 (0)22 305 58 61

28 **Keywords:** Geospatial analysis; Alcohol consumption; Alcohol control policies; Spatial clustering;  
29 Spatial modelling; GWR; MGWR; GIS.

30

31

32

33

34

35

36

37

38

39

40

41

42

43

44 **Funding**

45 The Bus Santé study is funded by the General Directorate of Health of the State of Geneva,  
46 Switzerland, and the Geneva University Hospitals.

47 **Acknowledgments**

48 The authors are grateful to the participants of the Bus Santé study.

49 **Conflicts of Interest**

50 The authors declare no conflict of interest. The funders had no role in the design of the study; in the  
51 collection, analyses, or interpretation of data; in the writing of the manuscript, or in the decision to  
52 publish the results.

53 **Data availability**

54 All data produced in the present study are available upon reasonable request to the authors

55 **Author Contributions**

56 Conceptualization, I.G., S.J., and D.D.R.; methodology, I.G., S.J., P.M.- V., and D.D.R.; formal  
57 analysis, D.D.R.; writing—original draft preparation, D.D.R., I.G., and S.J.; writing—review and  
58 editing, D.D.R., J.S., R.H., P.M.-V., S.S., S.J., and I.G.; figures, D.D.R.; supervision, S.J. and I.G.;  
59 project administration, S.J. and I.G.; funding acquisition, S.J. and I.G. All authors have read and  
60 agreed to the published version of the manuscript.

61  
62  
63  
64  
65  
66  
67  
68  
69  
70  
71  
72  
73  
74  
75  
76  
77  
78  
79  
80  
81  
82  
83  
84  
85  
86  
87  
88  
89  
90  
91

## 92 Abstract

### 93 Background

94 Alcohol consumption is a major risk factor for multiple chronic diseases and overall mortality.  
95 Consequently, multiple alcohol control policies have been implemented in Switzerland. Recent  
96 evidence shows that population-wide policies may have impacted some population subgroups and  
97 places differently. While the determinants of alcohol consumption are complex, understanding where  
98 interventions are needed is necessary for implementing targeted policies. Spatial statistics and  
99 modeling allow incorporating this spatial context into the analysis of alcohol consumption and its  
100 determinants.

### 101 102 Methods

103 We used the 1993-2018 Bus Santé annual population-based surveys including 18,515 participants  
104 aged 35-74 years residing in the canton of Geneva, Switzerland. We assessed the existence of spatial  
105 clustering of alcohol consumption the local Moran's *I* spatial statistics. To evaluate how the spatial  
106 distribution of alcohol consumption may have changed over time, we subdivided the study sample  
107 into three subsamples according to periods of alcohol-control policies implementation: before (Period  
108 1 (P1): 1993.01.01-1999.06.30), during (Period 2 (P2): 1999.07.01-2009.10.31), and after (Period 3  
109 (P3): 2009.11.01-2018.12.31). We also investigated socio-demographic and built environment  
110 determinants of alcohol consumption across periods and provided a comparison of the performance  
111 and results of global ordinary least squares (OLS), local geographically weighted regression (GWR),  
112 and multiscale GWR (MGWR) models.

### 113 114 Results

115 We found spatial clustering of alcohol consumption in the three analyzed periods. Alcohol  
116 consumption in local clusters markedly decreased across periods despite increasing alcohol outlet  
117 accessibility. The spatial distribution of higher alcohol consumption clusters (i.e., hot spots) and of  
118 lower alcohol consumption clusters (i.e., cold spots) changed slightly across periods. Alcohol  
119 consumption in hot spots remained above recommendations in P3 (26.0 g/day, SD  $\pm$  17.2 g/day),  
120 particularly for women. Cold spots increased in size (4.6% of the participants in P1, 9.3% in P3),  
121 particularly in the period following the implementation of policies (P2 to P3) while hot spots  
122 remained stable (3.2% of the participants). Alcohol consumption was significantly higher in hot spots  
123 than cold spots in all three periods ( $p < 0.001$ ).

124 The MGWR model outperformed the OLS and GWR models in most cases and revealed that alcohol  
125 consumption was influenced by a mix of global and local relationships. Several of these relationships  
126 evolved across periods. Interestingly, in models adjusted for individual-level determinants, we found  
127 significant positive relationships between bar density and alcohol consumption in P1 and between  
128 density of off-premises alcohol outlets and alcohol consumption in P2. However, these two  
129 associations were not significant in P3 potentially due to alcohol control policies.

### 130 Conclusion

131 Our results reveal that certain areas and subgroups in need of public health intervention and show that  
132 a mix of global and local processes best model alcohol consumption. In addition, this study highlights  
133 the potential of geospatial approaches to provide a refined understanding of the determinants of  
134 alcohol consumption, and the spatial scales at which they vary.

135

136

137

138

## 139 Introduction

140 Alcohol consumption remains a major risk factor of avoidable disease burden [1,2]. It has been  
141 associated with an increased risk of developing numerous non-communicable diseases, infectious  
142 diseases, and injuries, which together are estimated to represent about 6% of worldwide mortality [1].  
143 Policies, programs, and initiatives aiming at reducing alcohol consumption had overall success in the  
144 past decades [3]. In Switzerland, alcohol consumption per capita decreased from around 15 liters of  
145 pure alcohol in the 1990s to 10 liters in 2016 [4].

146 Controlling for the availability of alcohol is a key approach for reducing excessive alcohol  
147 consumption [5]. A recent review found that greater outlet density is associated with increased  
148 alcohol consumption [6,7]. As in other countries, multiple alcohol control laws were implemented  
149 over the last two decades in Switzerland, particularly in the canton of Geneva [4]. In 1999, a cantonal  
150 law limiting alcohol and tobacco advertisement was introduced. In 2004, the taxation on alcopop  
151 beverages was substantially increased (+300%). In 2005, the legal blood alcohol content driving  
152 limited was lowered, off-premises alcohol sale between 9 p.m. and 7 a.m. was interdicted, and an  
153 alcohol sale ban in video stores and gas stations were implemented. Moreover, in 2009, a smoking  
154 ban in indoor public spaces was introduced. Smoking bans have been suggested to be associated with  
155 reduced alcohol consumption [8].

156 However, population-wide strategies are a one-size-fits-all approach and may not be sufficient for  
157 prevention and control. Additionally, these approaches, depending on their design, may not address  
158 alcohol-related health inequalities due to unequal responsiveness. For example, in Geneva, despite  
159 structural policies implemented over the past decade that probably contributed to a decrease in alcohol  
160 consumption, they were not sufficient to reduce the social inequality gap in alcohol consumption,  
161 with high consumption persisting in individuals of lower socioeconomic status (SES) [9].

162 Recent studies have highlighted the existence of spatial clustering of alcohol consumption, raising  
163 questions about the factors that may explain such clustering [10–12]. How different policies influence  
164 the geographical distribution of alcohol consumption remains unclear.

165 Health behaviors, including alcohol consumption, are influenced by a complex array of individual-  
166 level and social, economic, and built environment factors, themselves shaped by policies [13].  
167 Identifying populations and places where alcohol consumption remains above recommended levels  
168 and uncovering how individual and neighborhood-level determinants of alcohol consumption may  
169 have evolved following the implementation of alcohol control policies could help define targeted  
170 local public health interventions and urban planning policies, complementing global alcohol  
171 regulations [11]. However, most existing studies assessing the relationships between individual and  
172 neighborhood-level characteristics and alcohol consumption did not account for spatial dependence  
173 between individuals [14–17]. The presence of spatial dependence may bias the obtained results in  
174 meaningful ways. Notably, it violates the assumption of independence of the studied observations  
175 required by traditional linear and multilevel regression models [18].

176 Using a large, repeated cross-sectional population-based surveys spanning 25 years (1993-2018), we  
177 aimed to examine the existence of spatial clusters of alcohol consumption in three periods defined by  
178 the implementation of alcohol control policies: i) before (1993.01.01-1999.06.30), ii) during  
179 (1999.07.01-2009.10.31) and iii) after implementation (2009.11.01-2018.12.31). A secondary  
180 objective was to investigate the individual and neighborhood-level socioeconomic and build-  
181 environment determinants of alcohol consumption and whether these determinants may have changed  
182 across periods.

183

184

## 185 **Methods**

### 186 **Study design and sample**

187 Data for this study was collected through the Bus Santé study, a continuing population-based study in  
188 the canton of Geneva (population of approximately 500,000 inhabitants in 2021), monitoring health  
189 and cardiovascular risk factors. As previously described [19], independent samples of residents were  
190 subjected to health examination surveys since 1993. The Bus Santé study's recruitment methods have  
191 been described in details elsewhere [19,20]. The geocoded residential address of each participant was  
192 used for spatial analyses. Since using small units of analysis allows increased resolution of spatial  
193 analysis, we used individual points to avoid the bias resulting from the modifiable areal unit problem  
194 (MAUP), which affects results when point-based measures are aggregated [21]. The Bus Santé study  
195 was approved by the Cantonal Research Ethics Commission of Geneva, Switzerland (PB 2016-  
196 00363).

### 197 **Periods of alcohol control policies**

198 We defined three time periods to enable analyses and comparisons before, during, and after  
199 implementing alcohol control policies. The period from 1993.01.01 to 1999.06.30 correspond to the  
200 first period (P1) before implementing alcohol control policies. The period 1999.07.01-2009.10.31  
201 corresponds the second period (P2), during which a set of policies to control alcohol consumption  
202 were implemented in Switzerland and the canton of Geneva particularly. Finally, the period  
203 2009.11.01-2018.12.31 corresponds to the period after implementing alcohol control policies (P3).  
204 Separating each policy into specific periods according to their implementation date would have been  
205 of interest to study their potential impact. However, this would have created several short periods with  
206 few participants thus reducing power for spatial and statistical analyses.

### 207 **Outcome variable**

208 Total daily alcohol intake was determined using a self-administered, semiquantitative food frequency  
209 questionnaire (FFQ) originally developed and validated against 24-hour dietary recalls [22]. The FFQ  
210 considers consumption frequency, ranging from “never during the last four weeks” to “two or more  
211 times per day”, and the type of alcohol beverage (wine, beer, aperitifs, champagne, and spirits like  
212 liqueur, brandy, or whisky) and average serving size compared with a 10g alcohol standard for each  
213 beverage (similar, bigger or smaller) [9]. The same FFQ was used throughout the entire study period  
214 (1993-2018), and data derived from this FFQ has integrated large international consortia [23,24].

### 215 **Individual and neighborhood-level covariates**

216 Individual-level covariates included gender, age, educational attainment (tertiary education: yes or  
217 no), civil status (married-cohabiting: yes or no), nationality (Swiss-born, foreign-born), occupational  
218 level (low—manual and lower occupations, medium—non-manual occupations, high—professional  
219 and intermediate professions, and not working), and smoking status (current smoker: yes or no).  
220 Individual income data being missing for participants before 2007, we used the annual neighborhood  
221 median household income for the years from 2005 to 2016. We assigned this area-level income to  
222 participants based on their year of participation and their corresponding statistical subsector in  
223 Geneva (GIRECs) – a neighborhood definition created by the canton of Geneva (Office Cantonal de  
224 la Statistique, [www.ge.ch/statistique](http://www.ge.ch/statistique)). Participants from 1993 to 2005 were assigned neighborhood  
225 income values from 2005, and participants from 2016 to 2018 were attributed values from 2016.

### 226 **Physical accessibility to alcohol outlets**

227 We obtained the dataset of all registered companies in the canton of Geneva compiled by the the  
228 “Répertoire des entreprises de Genève” (REG) [25] and made available by the “Système  
229 d’information du territoire à Genève (SITG)” [26]. Yearly listings of all the companies registered in  
230 the canton were available from 2003 to 2018 (excepted 2006 and 2007). They contained designations

231 that allowed us to disaggregate by outlet type, including off-premise outlets (convenience stores,  
232 grocery shops, gas stations, and supermarkets) and on-premise outlets (restaurants, nightclubs, and  
233 bars). We excluded the category “gas stations” from the calculation of off-premises outlet density  
234 after 2005 to consider the implementation of an alcohol sale ban in these amenities starting that year.  
235 Geographic coordinates of each amenity were provided in the dataset. For each participant, we  
236 assessed the density of each alcohol outlet category through street network-based accessibility  
237 analyses. To consider the evolution in the built environment over the study period (1993–2018), we  
238 matched the participation year of each participant to the closest year available in the alcohol outlet  
239 dataset (Table S1).

240 For each alcohol outlet category, alcohol outlet density was calculated as the sum of alcohol outlets in  
241 participants’ neighborhoods defined as 1,200m street network buffers. The street network of the  
242 canton of Geneva was obtained using the OSMnx Python package [27]. The study participants and  
243 alcohol outlets were snapped to the nearest segment of the street network using a maximum snapping  
244 distance of 50m. The Pandana Python package was used to create the street network buffers and  
245 perform the accessibility analyses [28]. A linear decay was used to give more weight to nearby  
246 locations compared to farther ones. The distance of 1,200m was selected based on the results of the  
247 global autocorrelation analysis and corresponded to a walking time of around 15min, which has been  
248 considered relevant to individuals’ residential spatial scale [29].

## 249 **Exclusion criteria**

250 We included participants with ages between 35 and 74 years, the age group that has been consistently  
251 recruited since the beginning of the Bus Santé study. We excluded abstinent participants (n = 3,568,  
252 15.7%) and participants with missing data for alcohol consumption (n = 53, 0.2%) on civil status (n =  
253 25, 0.1%), educational attainment (n = 222, 1.2%), nationality (n = 91, 0.5%) and neighborhood  
254 median household income (n = 294, 1.6%). Data from the remaining 18,515 individuals (P1, n =  
255 5,215; P2, n = 7,013; P3, n = 6,287) were used for the analyses (Table 1).

## 256 **Regression analyses**

257 The assumptions of traditional global regression models such as ordinary least squares (OLS) might  
258 not be satisfied in the presence of spatial autocorrelation as these assume that relationships are  
259 constant across the study area [18,30]. However, many individuals and environmental characteristics  
260 are spatially dependent. Local models such as the geographically weighted regression (GWR) have  
261 been introduced to relax this assumption of spatial stationarity by allowing relationships to vary over  
262 space and obtains local parameter estimates by calibrating a locally weighted regression at each  
263 location of the dataset [31]. GWR generally provides increased model fit and reduced residual spatial  
264 autocorrelation compared to traditional global models that assume that relationships are constant over  
265 space [32,33].

266 Local regressions are fitted through a distance-weighting scheme using a spatial weights matrix that  
267 defines the relationships between observations and places more weight on closer data points than  
268 remote ones [34]. The spatial weights matrix is defined by three characteristics, a kernel function, a  
269 bandwidth, and proximity measure. We used a bi-square kernel function with a bandwidth parameter  
270 based on the number of nearest neighbors away from the calibration point that minimizes a corrected  
271 Akaike information criterion (AICc). The bi-square function presents the advantage of assigning a  
272 weight of zero to observations outside the bandwidth, facilitating interpretation compared to the  
273 Gaussian kernel function that may retain non-zero weights for all observations. One limitation of the  
274 GWR is that it uses the same bandwidth for all relationships, thus assuming that all spatial processes  
275 vary at the same scale [34]. A recent extension to the GWR, the multiscale GWR (MGWR), relaxes  
276 this assumption using a different bandwidth for each relationship, ensuring that a correct data-  
277 borrowing scale is employed, thus capturing spatial heterogeneity more accurately [31].

278 To investigate the relationships between individual and neighborhood-level socio-demographic and  
279 environmental characteristics and daily alcohol intake (g/day), we first calibrated global ordinary least

280 squares (OLS) regression models at each period (i.e., P1, P2, and P3). The built-environment  
281 explanatory variables included in the multivariate regression models were selected using univariate  
282 OLS models and based on statistical significance ( $p < 0.05$ ) and a variance inflation factor (VIF)  
283 below 7.5. Next, we assessed the presence of spatial autocorrelation in the residuals using the global  
284 Moran's I statistic using a fixed distance bandwidth of 1,200m. Subsequently, GWR and MGWR  
285 models were calibrated for the three periods. Model selection between OLS, GWR, and MGWR was  
286 done using AICc, examining overall model fit and complexity; lower AICc values indicating a better  
287 fit.

## 288 **Global spatial clustering**

289 We assessed the presence of overall spatial dependence in the outcome variable with the Global  
290 Moran's I statistic, which is the most commonly used statistic to test for global spatial autocorrelation  
291 [35]. Each observation is analyzed within the context of those neighboring observations within a  
292 specified critical distance. Relationships between observations are defined using a spatial weights  
293 matrix. To determine the distance corresponding to the maximum spatial autocorrelation, the distance  
294 at which the spatial process is the most pronounced, we computed the Global Moran's I at  
295 incremental fixed distance bands (200m, 400m, 600m, 800m, 1,000m, and 1,200m) and the distance  
296 at which the statistically significant z-score peaked was selected. Observations within the distance  
297 band are assigned the same weight, and observations outside the selected distance are assigned a zero  
298 weight and thus do not influence calculations for that observation. Statistical significance was  
299 assessed through a Monte Carlo procedure consisting of 999 random permutations, which return a  
300 pseudo-p-value associated with the Moran's I statistic.

## 301 **Local spatial clustering**

302 Global clustering statistics evaluate spatial clustering in the study area but cannot detect where local  
303 clusters may exist. Investigating the presence of local spatial clustering in alcohol consumption  
304 through spatial cluster detection provides insights into the impact of alcohol control policies on the  
305 spatial distribution of alcohol consumption. Univariate local spatial cluster analysis was conducted by  
306 calculating the local Moran's I statistic [36]. This analysis returns a local Moran's I value, a z-score, a  
307 pseudo-p-value, and a category representing the cluster type for each statistically significant  
308 observation. There are four categories of statistically significant values, hot spots (High-High), low-  
309 spots (Low-Low), and spatial outliers: high value surrounded by low values (High-Low) and low  
310 value surrounded by high values (Low-High). Observations with a p-value smaller than 0.05 are  
311 considered statistically significant. To investigate whether individual and neighborhood-level socio-  
312 demographic characteristics and alcohol availability may explain local clustering of alcohol  
313 consumption, we calculated and mapped the local Moran's I categories before and after adjustment  
314 for covariates using the best performing model among OLS, GWR, and MGWR. After adjustment, a  
315 reduction of local clusters signifies that the covariates in the adjustment model explained the spatial  
316 clustering.

## 317 **Changes in the characteristics of high-high and low-low spatial clusters of alcohol** 318 **consumption**

319 To investigate a potential change in the characteristics of individuals belonging to hot spots and cold  
320 spots of alcohol consumption across the three periods, we compared their socio-demographic and  
321 alcohol availability characteristics using Welch's t-tests and Fisher exact tests for numeric and binary  
322 variables, respectively. We presented these results using radar plots to optimize the visualization of  
323 many studied explanatory variables.

324

325

326

## 327 Results

### 328 Descriptive statistics

329 Sample individual and neighborhood-level characteristics are described in Table 1. There was  
 330 significant variation in the physical access to alcohol outlets due to the study area comprising rural  
 331 and urban areas. Globally, access to alcohol outlets increased from period one to period three, with a  
 332 stronger trend for on-premises outlets.

333 **Table 1 - Socio-demographic characteristics of the Bus Santé participants, Geneva, Switzerland**  
 334 **(1993-2018)**

|                                                       | Period 1 (P1)        | Period 2 (P2)        | Period 3 (P3)        |
|-------------------------------------------------------|----------------------|----------------------|----------------------|
| Sample size (n)                                       | 5,215                | 7,013                | 6,287                |
| Age, mean (SD)                                        | 51.3 (10.5)          | 51.7 (10.9)          | 52.2 (11.0)          |
| Neighborhood median household income (CHF), mean (SD) | 122,989.8 (36,573.3) | 127,293.0 (39,729.3) | 138,323.2 (45,052.5) |
| Sex (%)                                               |                      |                      |                      |
| Woman                                                 | 2,423 (46.5)         | 3,286 (46.9)         | 3,015 (48.0)         |
| Man                                                   | 2,792 (53.5)         | 3,727 (53.1)         | 3,272 (52.0)         |
| Marital status (%)                                    |                      |                      |                      |
| Married/cohabiting                                    | 4,113 (78.9)         | 5,241 (74.7)         | 4,309 (68.5)         |
| Not married/cohabiting                                | 1,102 (21.1)         | 1,772 (25.3)         | 1,978 (31.5)         |
| Education                                             |                      |                      |                      |
| Tertiary                                              | 1,595 (30.6)         | 2,630 (37.5)         | 3,119 (49.6)         |
| Lower than tertiary                                   | 3,620 (69.4)         | 4,383 (62.5)         | 3,168 (50.4)         |
| Occupational level                                    |                      |                      |                      |
| Not working                                           | 140 (2.7)            | 167 (2.4)            | 161 (2.6)            |
| Low                                                   | 2,119 (40.6)         | 3,023 (43.1)         | 3,081 (49.0)         |
| Medium                                                | 1,902 (36.5)         | 2,428 (34.6)         | 1,899 (30.2)         |
| High                                                  | 1,054 (20.2)         | 1,395 (19.9)         | 1,146 (18.2)         |
| Smoking status (%)                                    |                      |                      |                      |
| Smoker                                                | 1,188 (22.8)         | 1741 (24.8)          | 1,313 (20.9)         |
| Non-smoker                                            | 4,027 (77.2)         | 5,272 (75.2)         | 4,974 (79.1)         |
| Nationality (%)                                       |                      |                      |                      |
| Swiss                                                 | 3,781 (72.5)         | 5,073 (72.3)         | 4,305 (68.5)         |
| Other                                                 | 1,434 (27.5)         | 1,940 (27.7)         | 1,982 (31.5)         |

335 *Note: SD, standard deviation*

336 Median daily alcohol consumption stratified by period and individual characteristics are provided in  
 337 Table 2. Over half of the respondents of each period were male. This slight imbalance can be  
 338 explained by the exclusion of non-drinkers which are predominantly women. The mean age was  
 339 around 50 years for all three periods.

340

341 **Table 2 - Alcohol intake (g/day) of the Bus Santé participants, Geneva, Switzerland (1993-2018)**  
 342 **stratified by individual-level characteristics**

|  | Period 1 (P1) | Period 2 (P2) | Period 3 (P3) |
|--|---------------|---------------|---------------|
|--|---------------|---------------|---------------|



|                          | Period 1 (P1)   | Period 2 (P2)   | Period 3 (P3)   |
|--------------------------|-----------------|-----------------|-----------------|
| Sample size (n)          | 5,215           | 7,013           | 6,287           |
| Gender [IQR]             |                 |                 |                 |
| Woman                    | 10.8 [2.7-14.1] | 9.9 [2.5-13.2]  | 8.2 [1.8-11.1]  |
| Man                      | 23.5 [7.1-32.3] | 21.4 [5.9-28.6] | 16.2 [4.4-20.3] |
| Marital status [IQR]     |                 |                 |                 |
| Married/cohabiting       | 17.7 [4.0-22.7] | 16.2 [3.6-21.0] | 12.5 [2.9-16.0] |
| Not married/cohabiting   | 17.1 [3.6-22.6] | 15.5 [3.0-19.8] | 12.0 [2.8-15.8] |
| Education [IQR]          |                 |                 |                 |
| Tertiary                 | 16.3 [4.0-21.6] | 14.0 [3.2-19.4] | 11.2 [3.0-14.8] |
| Lower than tertiary      | 18.2 [3.8-23.7] | 17.2 [3.6-22.3] | 13.5 [2.8-16.6] |
| Occupational level [IQR] |                 |                 |                 |
| Not working              | 11.8 [1.7-14.5] | 11.3 [2.8-16.2] | 10.3 [2.5-13.5] |
| Low                      | 18.1 [4.4-23.7] | 15.6 [4.0-20.5] | 12.1 [3.0-16.1] |
| Medium                   | 14.7 [2.8-19.2] | 13.6 [2.8-17.4] | 10.3 [2.5-13.2] |
| High                     | 22.7 [4.7-33.0] | 21.8 [4.7-33.0] | 16.5 [2.9-20.8] |
| Smoking status [IQR]     |                 |                 |                 |
| Smoker                   | 23.6 [6.0-33.3] | 20.3 [4.7-27.5] | 15.5 [3.3-19.8] |
| Non-smoker               | 15.8 [3.3-20.7] | 14.6 [3.0-19.8] | 11.5 [2.8-14.4] |
| Country of birth [IQR]   |                 |                 |                 |
| Switzerland              | 16.8 [3.6-21.6] | 15.2 [3.3-19.8] | 12.0 [2.9-15.8] |
| Other                    | 19.6 [4.2-26.6] | 18.2 [3.6-25.3] | 13.1 [2.8-16.0] |

343 *Note: IQR, interquartile range*

### 344 **Regression analyses**

345 The univariate OLS models showed that categories of alcohol outlets were significantly associated  
346 with alcohol consumption, at different periods. Bar density had a positive relationship with alcohol  
347 consumption in P1, and both off-premises outlet density and on-premises outlet density had  
348 statistically significant positive relationship with alcohol consumption in P2. No significant  
349 association between measures of alcohol outlets density and alcohol consumption were identified in  
350 P3.

351 We calibrated a separate multivariate OLS model for each of the three retained alcohol outlet  
352 categories (i.e., bars, off-premises, and on-premises) for each period. All models controlled for  
353 individual and neighborhood-level socio-demographic covariates. The coefficient estimates and  
354 standard errors are presented in table S2. In P1, age, smoking status, a high occupational level,  
355 neighborhood median income, and bar density were positively associated with alcohol consumption.  
356 Being a woman had a strong negative relationship with alcohol consumption and, to a lesser degree,  
357 having Swiss nationality. In P2, the same relationships were observed apart from neighborhood  
358 median income, which was not significantly associated with alcohol consumption. Additionally, while  
359 bar density was not associated with alcohol consumption, the density of on-premises and off-premises  
360 alcohol outlets had a relatively strong positive relationship with alcohol consumption. Finally, in P3,  
361 we found a negative relationship between tertiary education and alcohol consumption and no  
362 statistically significant relationships between alcohol outlets density and alcohol consumption. Of  
363 note, gender, age, high occupational level, and smoking status remained associated with alcohol  
364 consumption, but to a lesser extent than in P1 and P2. The global spatial autocorrelation analysis in  
365 the models' residuals revealed statistically significant global Moran's I in several models (Table S3),  
366 suggesting that global OLS models may be inappropriate.

367 GWR models were calibrated using the same sets of explanatory variables used in global models. In  
368 P1 and P2, the optimal bandwidths included all nearest neighbors (i.e., global scale), indicating that  
369 all the data was included in each local subset. In P3, the optimal bandwidths were relatively more  
370 regional, with 4,327 nearest neighbors in model 1, 3,676 in model 2, and 3,763 in model 3. GWR  
371 models showed mixed performance. Values of  $R^2$  were slightly higher in P1 and P2 and much higher  
372 in P3. In terms of AIC, in P1 and P2, GWR showed a worse model fit than OLS, while in P3, GWR  
373 outperformed the global model. Finally, residual spatial autocorrelation remained in several instances.  
374 Therefore, a MGWR model may be necessary to allow processes to vary at unique scales.

375 The MGWR model showed improved performance in most cases (Table S3), with lower AICc and  
376 reduced residual spatial autocorrelation. The calibration of a MGWR model produced an optimized  
377 bandwidth for each explanatory variable, describing the spatial scale at which each spatial process  
378 varies (Table S4) [34]. Relationships are thus not forced to be global or local a priori. Indeed, we  
379 observed that certain relationships occurred globally, indicated by a bandwidth comprising all  
380 neighbors, while others had small bandwidths indicating that they vary locally (Fig S1-3). This  
381 resulted in lower AIC and AICc and higher  $R^2$ .

382 We only presented parameter estimate surfaces for the best performing model of each period, model 1  
383 in P1 (Fig S1) and model 3 in P2 (Fig S2) and P3 (Fig S3). Several spatial patterns can be observed  
384 thanks to the MGWR parameter estimates surfaces (Fig S1-3, right) in comparison to those from  
385 GWR (Fig S1-3, left). First, few parameters are effectively global with a statistically significant  
386 relationship with alcohol consumption: intercept, gender, nationality, neighborhood median income in  
387 P1; intercept, gender, high occupational level, and off-premises outlet density in P2; and none in P3.  
388 These showed little or no spatial variation and are in accordance with the GWR models where  
389 bandwidths were global in P1 and P2 and more local in P3. The negative or positive character of these  
390 global relationships was consistent with the results of the global regression models. Second, some  
391 parameters were found to be only statistically significant in some areas where there is little spatial  
392 variation: bar density in P1; tertiary education and nationality in P2 and P3. Again, the observed  
393 relationships with alcohol consumption agree with global models. Third, another category included  
394 surfaces with statistically significant parameters that vary locally: age and smoking status in P1 and  
395 P2; and intercept, age, gender, and smoking status in P3. Finally, some parameters were not  
396 statistically significant across the study area: civil status, educational attainment, occupational level in  
397 P1; civil status, medium- and low occupational level, neighborhood-level median income in P2; civil  
398 status, low and medium occupational level, neighborhood-level median income, off-premises outlet  
399 density in P3.

#### 400 **Global spatial autocorrelation**

401 There were spatial patterns in the physical accessibility to alcohol outlets in all periods. Global  
402 Moran's I values for most measures of physical accessibility were statistically significant ( $p = 0.001$ ).  
403 The density of participants and the high variability of daily alcohol consumption made it impossible  
404 to detect spatial patterns by simple observation. The global Moran's I calculation at incremental fixed  
405 distance bands showed that spatial autocorrelation in alcohol consumption peaked with a 400m fixed-  
406 distance band in P1 and a 1,200m band in P3 (Table S2). Alcohol consumption showed no statistically  
407 significant spatial autocorrelation in P2. We conducted spatial analyses using both 400m and 1,200m  
408 distance bands, but only results for 1,200m are presented. We preferred 1,200m over 400m because  
409 many participants, especially in rural areas, would not have neighbors at that distance, thus excluding  
410 them for spatial analyses. Both distances showed similar spatial patterns.

#### 411 **Local clustering of alcohol consumption**

412 We found local spatial clusters of alcohol consumption in each period. Spatial clusters of high and  
413 low daily alcohol consumption for the three periods are mapped in Fig 1-3. The spatial distribution of  
414 clusters was relatively stable across periods, with large hot and cold spots appearing in the same areas  
415 (Fig S4). The percentage of individuals in cold spots decreased from P1 to P2 and doubled from P2 to  
416 P3. The percentage of individuals in hot spots remained more stable in size. From P1 to P2, it showed

417 a slight increase that reduced to P1 levels in P3. P2 shows a distinctive pattern with a large hot spot  
418 located in the urban part of the canton of Geneva (Fig 2A).

419

420 The local cluster analyses of adjusted alcohol consumption, using the MGWR residuals, showed that  
421 local spatial clusters were greatly attenuated in P2 and P3, suggesting that the explanatory variables in  
422 the models were responsible for most of the spatial clustering (Fig 1-3B). In P1, the clusters remained  
423 stable after adjustment.

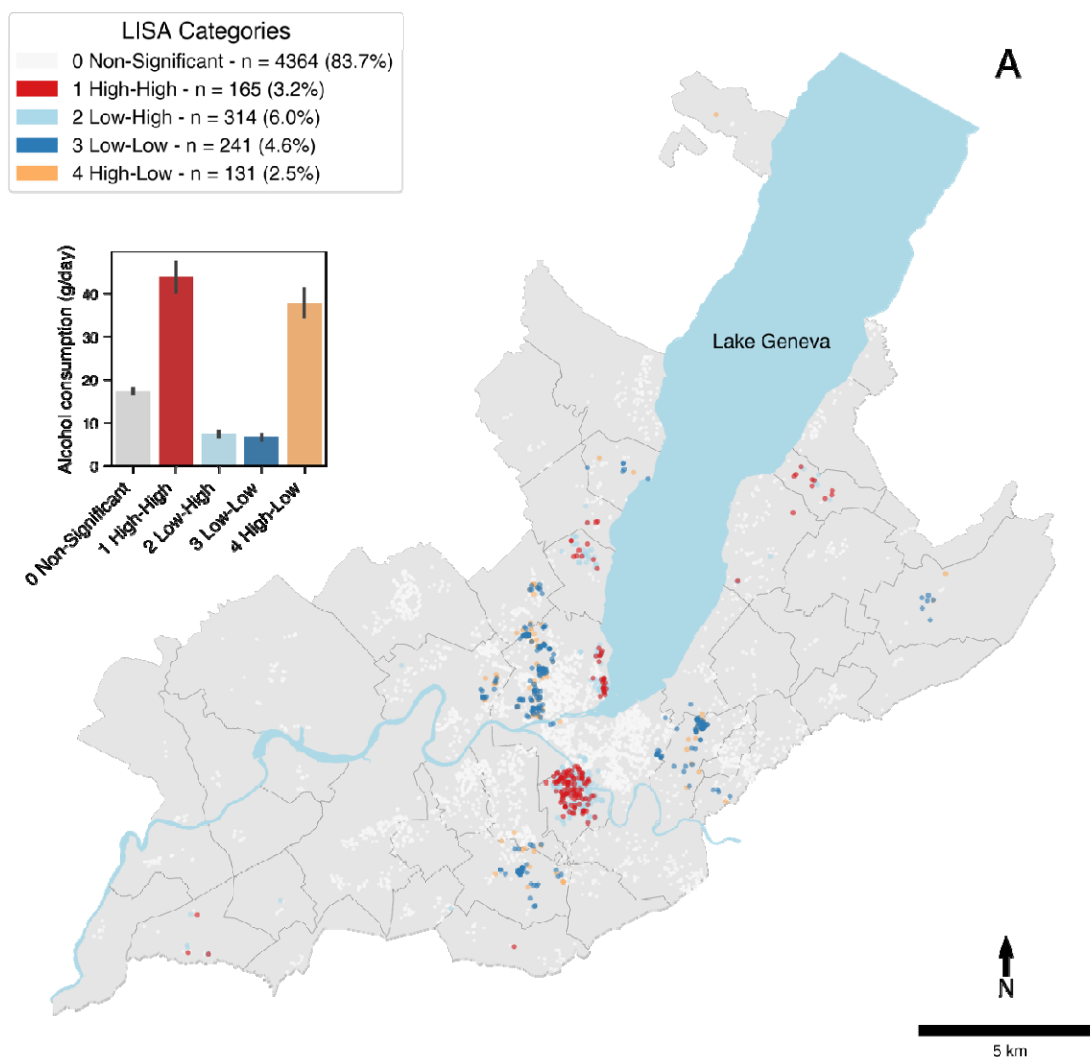

424

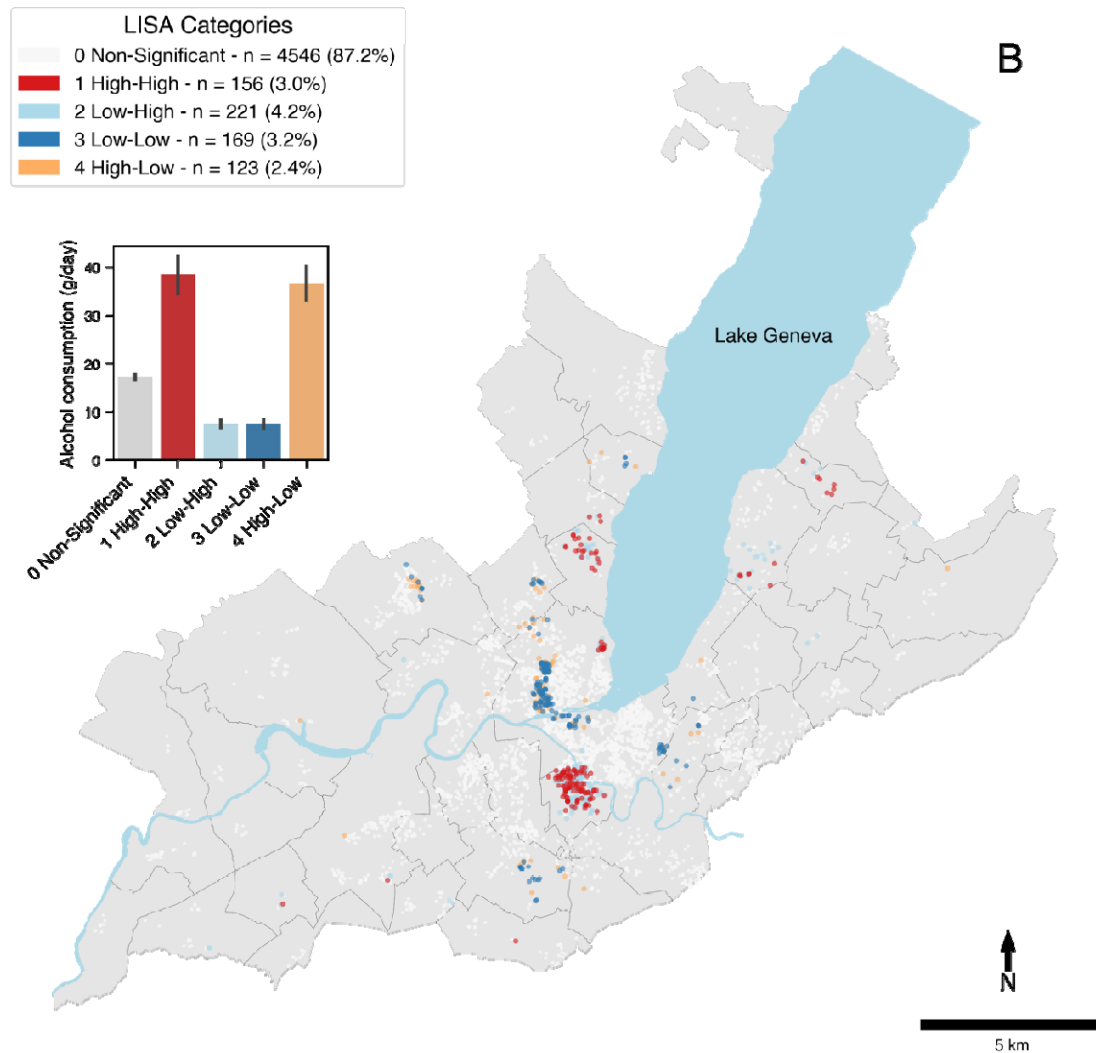

425

426 **Figure 1 - Local spatial clustering of alcohol consumption in period 1 (P1 – 1993.01.01-2009.06.30).** Local  
427 Moran's I spatial clusters of alcohol consumption (A) unadjusted and (B) adjusted for socio-demographic  
428 characteristics and physical accessibility to bars using a multiscale geographically weighted regression  
429 (MGWR model 1). The dark red markers (1 High-High) correspond to the individuals with a high alcohol  
430 consumption surrounded by individuals with a high alcohol consumption. The light blue markers (2 Low-High)  
431 correspond to individuals with a low alcohol consumption surrounded by individuals with a high alcohol  
432 consumption. The dark blue markers (3 Low-Low) correspond to individuals with a low alcohol consumption  
433 surrounded by individuals with a low alcohol consumption. The light red markers (4 High-Low) correspond to  
434 individuals with a high alcohol consumption surrounded by individuals with a low alcohol consumption. White  
435 markers are not significant at  $\alpha = 0.05$ . Black lines correspond to municipality delimitations. The bar plot  
436 shows the average alcohol consumption (g/day) according to LISA cluster categories. Error bars show 95%  
437 confidence intervals.

438

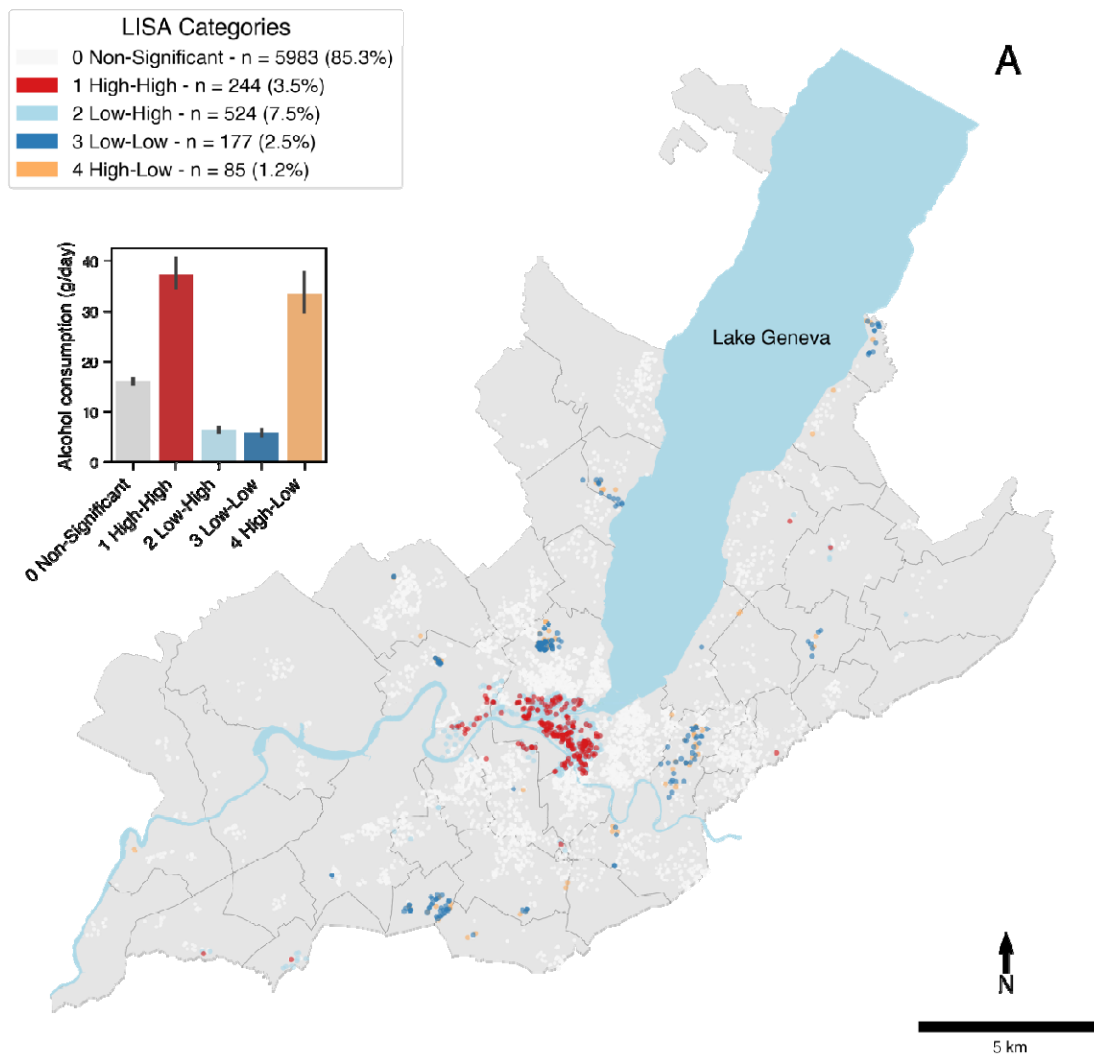

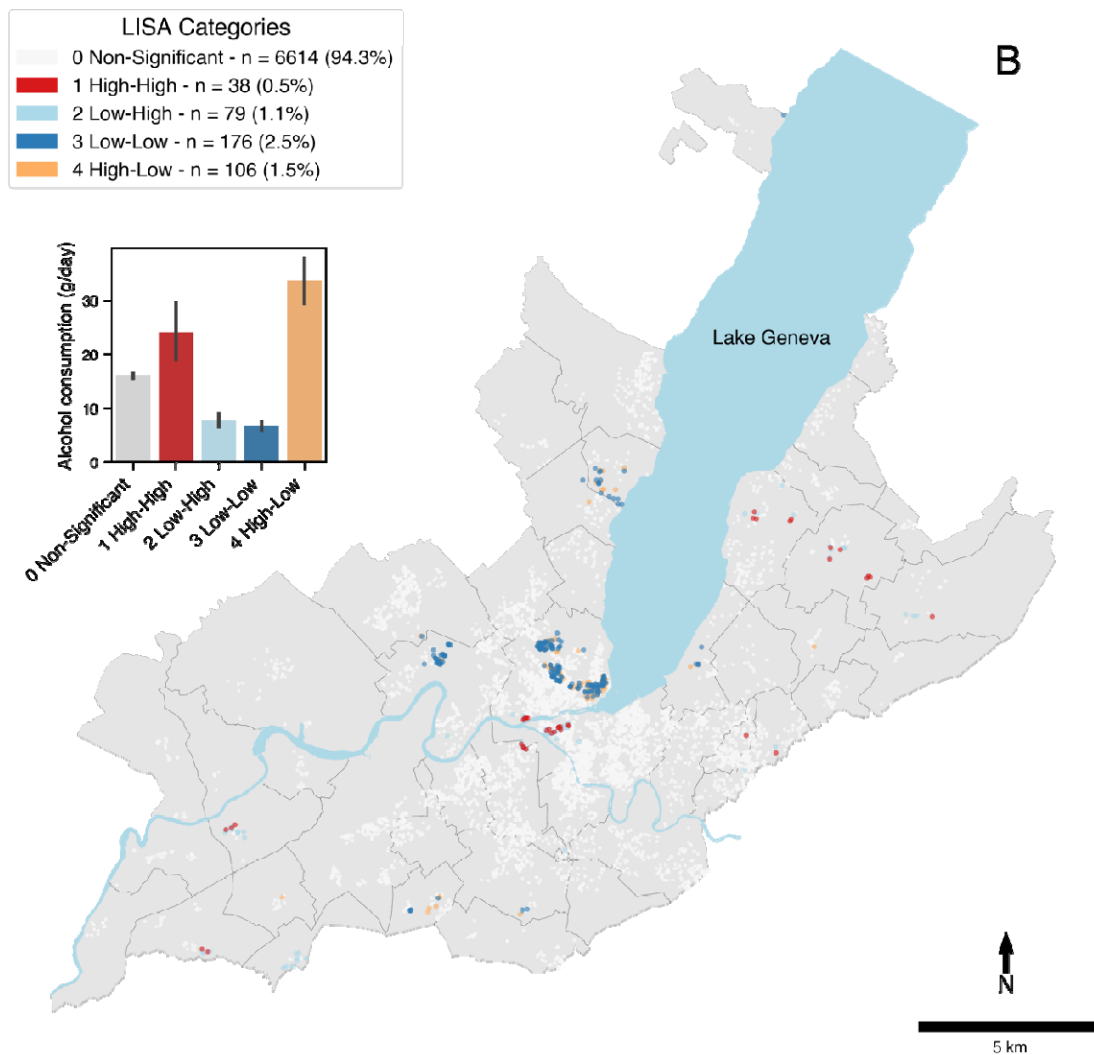

440

441 *Figure 2 - Local spatial clustering of alcohol consumption in period 2 (P2 – 1999.07.01-2009.10.31). Local*  
442 *Moran's I spatial clusters of alcohol consumption (A) unadjusted and (B) adjusted for socio-demographic*  
443 *characteristics and physical accessibility to off-premises alcohol outlets using a multiscale geographically*  
444 *weighted regression (MGWR model 3). The interpretation of local cluster categories remains the same as*  
445 *described on Fig 1.*

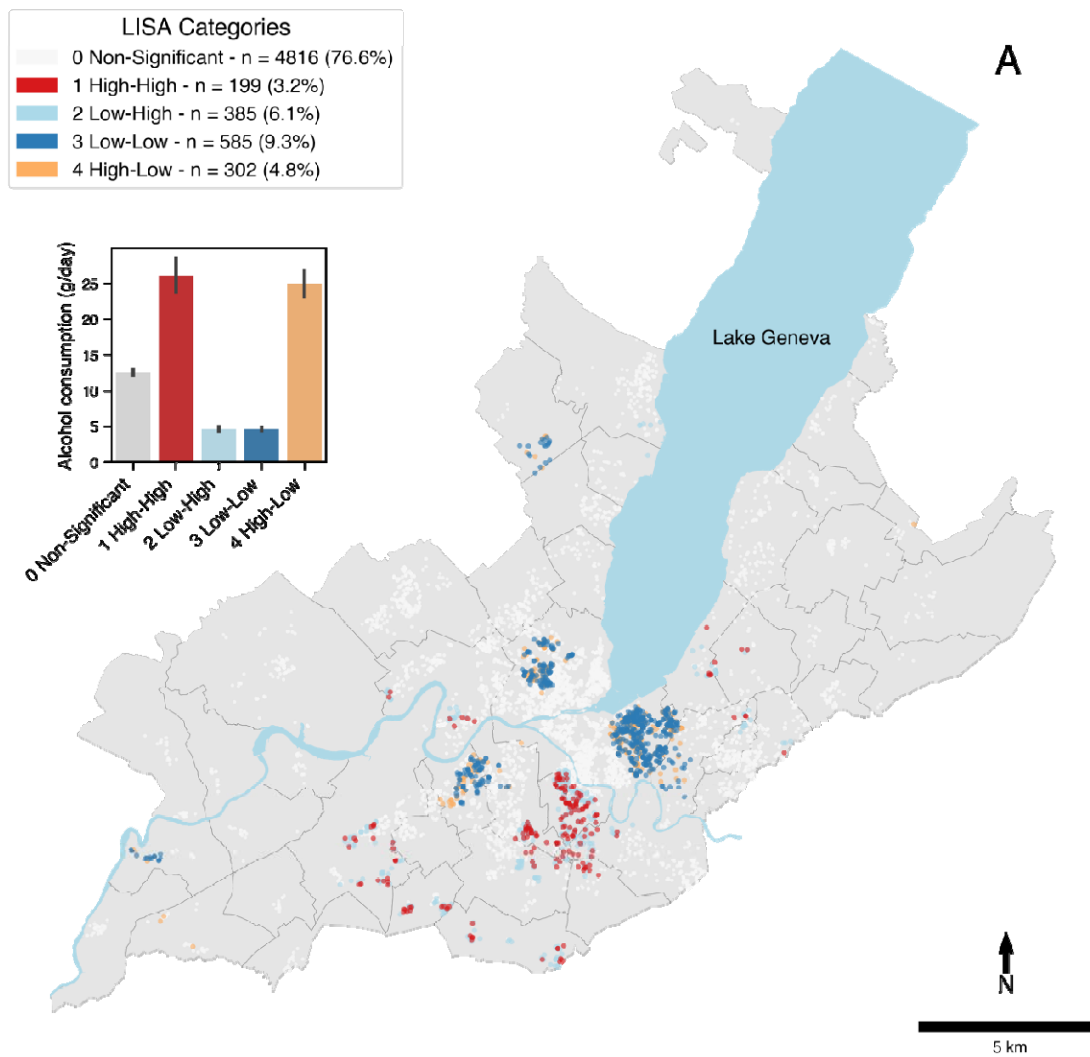

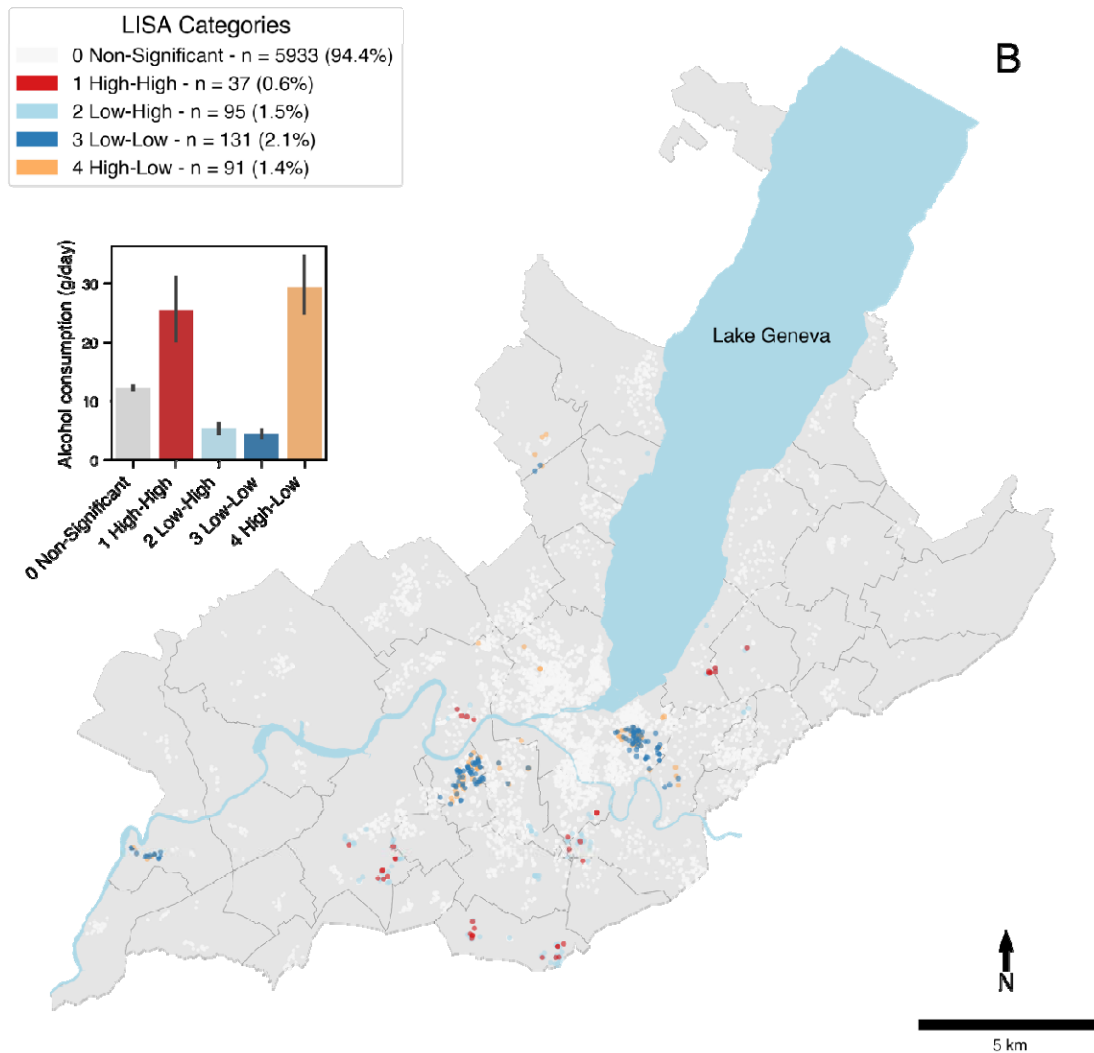

447

448 **Figure 3 - Local spatial clustering of alcohol consumption in period 3 (P3 – 2009.11.01-2018.12.31).** Local  
449 Moran's I spatial clusters of alcohol consumption (A) unadjusted and (B) adjusted for socio-demographic  
450 characteristics and physical accessibility to off-premises alcohol outlets using a multiscale geographically  
451 weighted regression (MGWR model 3). The interpretation of local cluster categories remains the same as  
452 described on Fig 1.

### 453 **Characteristics of local spatial clusters of alcohol consumption**

454 Individuals belonging to hot and cold spots had significant differences in socio-demographic  
455 characteristics and access to alcohol outlets.

456 In P1, individuals in the high-high category had an average alcohol consumption of 43.8g/day (SD ±  
457 22.5g/day), while individuals in the low-low category had an alcohol consumption of 6.7g/day (SD ±  
458 5.1g/day). Alcohol consumption was significantly higher in hot spots than in cold spots in all three  
459 periods ( $p < 0.001$ ). Significance was assessed with Welch's t-tests. The proportion of high  
460 occupational level individuals, smokers, men, and physical accessibility to alcohol outlets were higher  
461 in the high-high category. Neighborhood median household income and the proportion of individuals  
462 with a medium occupational level were higher in the low-low category (Fig 4A).

463 In P2, the differences in socio-demographic characteristics and alcohol accessibility were  
464 exacerbated, notably concerning physical accessibility to alcohol outlets, which was much higher for



465 individuals in the high-high category (Fig 4B). Additionally, high-high clusters had a lower  
466 neighborhood median income and a higher proportion of smokers. Of note, nationality and the  
467 proportion of married and cohabiting individuals were significantly higher in the low-low category.  
468 The average alcohol consumption decreased among individuals in the high-high category compared to  
469 P1 (37.3g/day, SD  $\pm$  22.3g/day). The consumption remained relatively stable in the low-low category  
470 (5.8g/day, SD  $\pm$  4.3g/day).

471 Finally, in P3, which corresponds to the period after the implementation of alcohol control policies,  
472 differences were strongly attenuated or even inverted (Fig 4C). The high-high category had lower  
473 physical accessibility to alcohol outlets than the low-low category. While inverted, the difference was  
474 less contrasted than in P1 and P2. The high-high category had a significantly higher proportion of  
475 Swiss nationality, married or cohabiting individuals, and individuals with a high occupational level.  
476 Additionally, individuals in the high-high category were significantly older than those in the low-low  
477 category. The proportion of individuals having a tertiary education was significantly higher in the  
478 low-low category. The average alcohol consumption among individuals in the high-high category  
479 decreased starkly (26.0g/day, SD  $\pm$  17.2g/day) compared to P2, yet it remained at levels harmful for  
480 health. The alcohol consumption in the low-low category decreased slightly to 4.6g/day (SD  $\pm$   
481 3.2g/day).

482

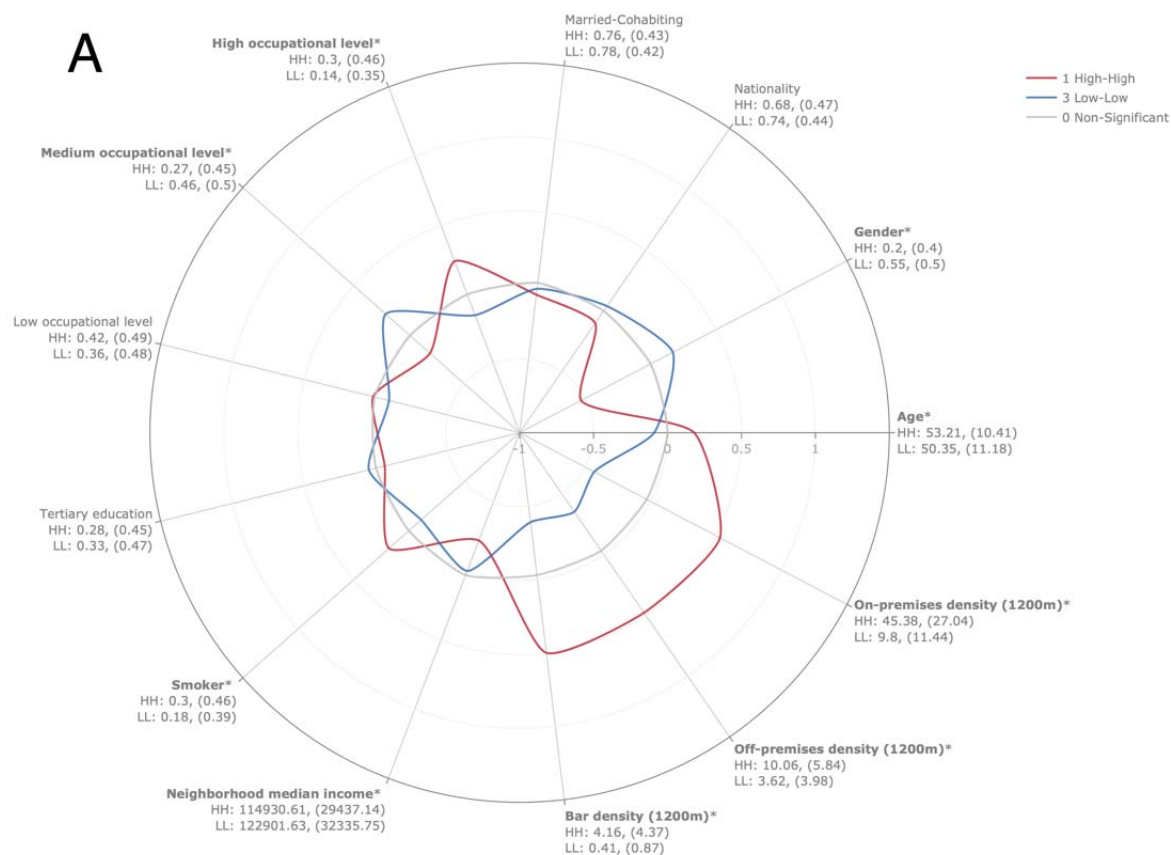

483

484

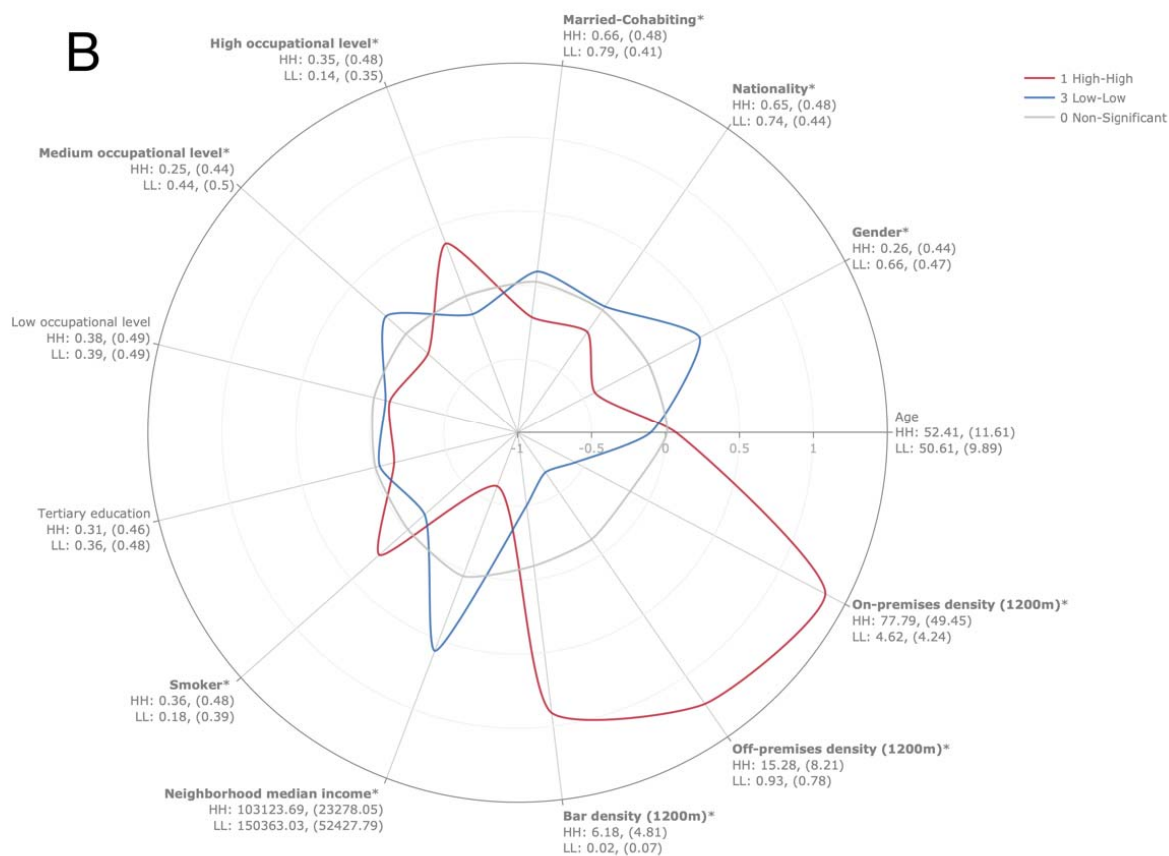

485

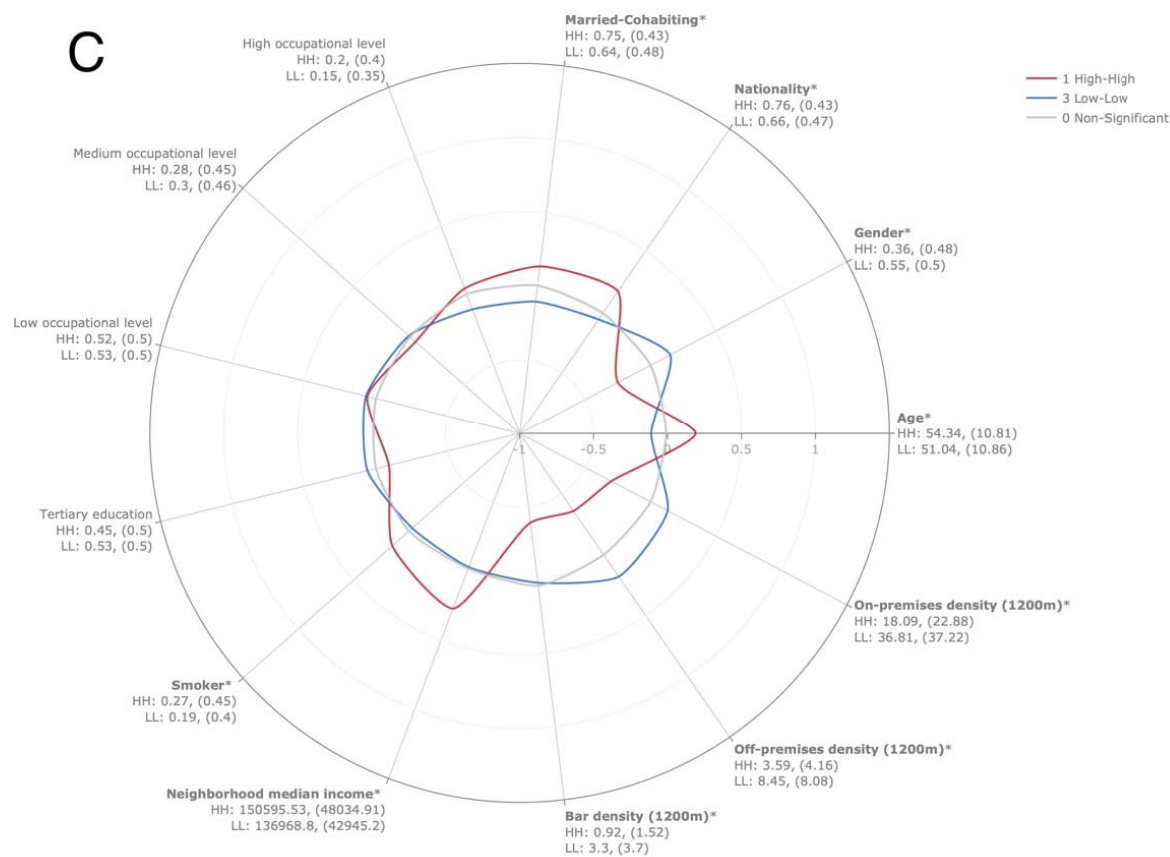

486

487 **Figure 4 - Characterization of local spatial clusters.** Radar plot of standardized socio-demographic  
 488 characteristics and physical alcohol availability in high-high and low-low spatial clusters for (A) period (P1),  
 489 (B) period 2 (P2) and (C) period 3 (P3). Mean, (SD) is provided under each characteristic. HH, high-high  
 490 class; LL, low-low class. Statistical significance evaluated using Welch's t-tests for continuous variables and  
 491 Fisher's exact tests for binary variables. \*p-value < 0.05.

492

493

494

495

496

497

498

499

500

501

502

503

## 504 Discussion

505 In this study, we detected spatial clustering of alcohol consumption in the canton of Geneva and  
506 changes in their spatial distribution before, during, and after the implementation of alcohol control  
507 policies. We found significant associations between alcohol consumption, individual and  
508 neighborhood-level socio-demographic characteristics and physical availability of alcohol outlets.  
509 Additionally, several of these associations evolved across periods. The results also demonstrate the  
510 potential of local models to improve the understanding of the determinants of alcohol consumption  
511 and the spatial scales at which they influence it.

512 In the first period (P1—1993.01.01-1999.06.30), individuals in hot spots of alcohol consumption had  
513 an average alcohol consumption much higher than the recommendation for low-risk alcohol  
514 consumption of 10g/day for women and 20g/day for men [37]. We found that average alcohol  
515 consumption in hot spots decreased between P1 and P2 (1999.07.01-2009.10.31) and, even more  
516 importantly, between P2 and P3 (2009.11.01-2018.12.31), despite increasing physical availability of  
517 alcohol outlets. In P3, alcohol consumption was closer to recommendations yet remaining inadequate,  
518 particularly for women. This highlights the potential of individual-level spatial analyses in uncovering  
519 precise areas and populations at risk of harmful chronic alcohol consumption and that would benefit  
520 from specific public health interventions. Studies conducted at lower spatial resolution may have  
521 missed such local variations in alcohol consumption behaviors due to the lost variance inherent to  
522 spatial aggregation [21,38].

523 Although at a much coarser spatial scale, local spatial clustering of alcohol consumption was  
524 previously reported in the literature [39]. Another study using individual-level data found no  
525 significant spatial clustering in alcohol consumption [11]; however the studied population were  
526 adolescents. Interestingly, the observed hot spots of alcohol consumption were much smaller than hot  
527 spots previously reported in the canton of Geneva for other risk factors such as body mass index,  
528 sugar-sweetened beverages, and salt intake [40–42]. Of note, hot spots decreased, and cold spots  
529 increased in size from P2 to P3, the period after implementing alcohol-control policies. Together, this  
530 suggests that the alcohol reduction strategies implemented in P2 were effective beyond reducing  
531 overall consumption [4,9] through a reduction in the size of consumption hot spots.

532 The adjustment for socio-demographic and physical alcohol availability led to an almost complete  
533 disappearance of spatial clusters of alcohol consumption, suggesting that these factors were  
534 responsible for most of the spatial clustering. However, other factors not accounted for in this study  
535 could explain the remaining spatial patterns. For example, we did not consider alcohol temporal and  
536 price availability, which has been reported to affect consumption [5,14]. Furthermore, non-spatial  
537 determinants of alcohol consumption have been reported in the literature, including the critical  
538 influence of individuals' social networks [43].

539 Our regression analyses, notably using the modern MGWR modeling technique, highlighted the  
540 existence of both global and local relationships between socio-demographic and physical availability  
541 of alcohol outlets and alcohol consumption. These relationships changed across periods, which could  
542 be due to the implementation of alcohol control policies. For example, there was a positive  
543 association between physical accessibility to bars and alcohol consumption in P1 and on-premises and  
544 off-premises alcohol outlets in P2, while no significant association was observed in P3. This trend  
545 was also observed in the hot and cold spots differences in alcohol availability between hot and cold  
546 spots, which were drastically reduced between P2 and P3. This suggests that the relationship between  
547 the built environment and alcohol consumption, reported in previous studies [5,44], may have  
548 changed over time, potentially due to the effectiveness of alcohol control policies implemented in P2  
549 and explicitly targeting the availability of alcohol (i.e., restricted alcohol sale hours and sale  
550 interdiction in gas stations and video stores) [6,17].

551 Finally, results also showed the complementarity of MGWR and local clustering. Indeed, geographic  
552 variation in the intercept of MGWR models corresponded to high and low alcohol consumption areas  
553 adjusted for the explanatory variables included in the model. This information supported the results of

554 the local clustering analyses. Indeed, spatial patterns in the intercept coincided with the observed  
555 spatial clusters after adjustment for covariates. For example, the large hot spot identified in P3  
556 corresponded to the area where the MGWR model showed a strong negative and significant  
557 relationship between higher education and alcohol consumption. This suggests that in that area where  
558 alcohol consumption is generally high, higher education is particularly protective against at-risk  
559 alcohol consumption.

## 560 **Strengths and limitations**

561 First, our study uses data from a large population-based study over a long period and with a  
562 homogenous and dense geographical distribution across the study area. The spatial scales of analysis  
563 were objectively determined for spatial autocorrelation analysis and regression analyses. Our spatial  
564 clustering analyses relied on widely used spatial statistics. The global and local Moran's I have been  
565 shown to be valid and robust indicators of spatial autocorrelation [30]. Additionally, our  
566 implementation of GWR and MGWR followed best practices for robust modeling of multiscale  
567 multivariate processes [31,34]. To the best of our knowledge, no existing studies have examined the  
568 spatial context of the determinants of alcohol consumption using MGWR. Such a geospatial approach  
569 was notably lacking in Switzerland, as most existing studies focused on US and UK populations  
570 [6,11]. Our study also aimed to address several methodological gaps reported in the literature [5]. We  
571 examined the relationship between alcohol physical availability and alcohol consumption using  
572 objective geographic measures of the built environment. Current and historical business listings were  
573 collected from a public source to avoid potential biases and missing data associated with business  
574 listings obtained from private companies. We used a street network-based approach recognized to  
575 capture better human mobility patterns than buffer or container approaches used in many previous  
576 studies [6]. We also examined both aggregated (i.e., on- and off-premises alcohol outlets) and  
577 disaggregated outlet categorizations to measure outlet density. This approach has been previously  
578 recommended to disentangle whether observed relationships apply to all outlet types or only certain  
579 ones [5]. Of note, our regression analyses showed no significant relationship between most  
580 disaggregated outlet categories and alcohol consumption, apart from bar density in P1. Additionally,  
581 our study focuses on the problem of average alcohol consumption, which has received little attention  
582 compared to acute alcohol consumption and related harms [45,46].

583 Several limitations of this study merit comment. First, the cross-sectional nature of the Bus Santé  
584 study precludes from evaluating the causality of observed relationships. Secondly, alcohol  
585 consumption was derived from self-reported FFQ data; we thus cannot exclude a social desirability  
586 bias. However, the same FFQ was used throughout the study period. The magnitude of the bias may  
587 have remained constant over time, allowing trends to be unaffected. Third, while recruitment methods  
588 of the Bus Santé study aimed at collecting information on a representative sample of the general  
589 population, participation bias may exist. Still, multiple strategies described in detail elsewhere have  
590 been introduced in the Bus Santé study recruitment to limit such bias [42]. Finally, we were only able  
591 to consider individuals' exposure to alcohol outlets around the place of residence. Recent evidence  
592 suggests additional exposure outside of the residential neighborhood. Future research should ideally  
593 draw on travel surveys and GPS data to better capture individuals' exposures. Nevertheless, exposure  
594 assessment is even complicated by increasing online alcohol advertising and sale with home delivery  
595 [5].

596

597

598

599

600

601

## 602 **Conclusions and policy implications**

603 Local clustering of alcohol consumption was detected in three time periods (P1, 1993-1999; P2, 1999-  
604 2009; P3, 2009-2018) defined by the implementation of an array of alcohol control policies from 1999  
605 to 2009. While decreasing substantially across periods, alcohol consumption in hot spots remained at  
606 inappropriate levels, particularly for women. Furthermore, the determinants of alcohol consumption  
607 changed over periods. Our findings show that specific socio-demographic and built environment  
608 characteristics are associated with increased alcohol consumption regardless of location (i.e., global  
609 scale). These may be the focus of population-wide programs and strategies. In contrast, other factors  
610 such as smoking status, nationality, being a woman, and higher education had more local relationships  
611 with alcohol consumption in the most recent period (2009-2018). By shedding light on the mix of  
612 spatial scales at which socio-demographic characteristics and alcohol availability influence alcohol  
613 consumption, our results may facilitate the development of improved, targeted public health  
614 interventions.

615

616

617

618

619

620

621

622

623

624

625

626

627

628

629

630

631

632

633

634

635

636

## 637 Bibliography

- 638 1. WHO. *Global Status Report on Alcohol and Health 2018.*; 2018.
- 639 2. Marmet S, Rehm J, Gmel G, Frick H, Gmel G. Alcohol-attributable mortality in Switzerland in  
640 2011 - Age-specific causes of death and impact of heavy versus non-heavy drinking. *Swiss*  
641 *Med Wkly.* 2014;144(2122):13947. doi:10.4414/smw.2014.13947
- 642 3. OECD. *Tackling Harmful Alcohol Use.* OECD; 2015. doi:10.1787/9789264181069-en
- 643 4. Dumont S, Marques-Vidal P, Favrod-Coune T, et al. Alcohol policy changes and 22-year  
644 trends in individual alcohol consumption in a Swiss adult population: A 1993-2014 cross-  
645 sectional population-based study. *BMJ Open.* 2017;7(3). doi:10.1136/bmjopen-2016-014828
- 646 5. Holmes J, Guo Y, Maheswaran R, Nicholls J, Meier PS, Brennan A. The impact of spatial and  
647 temporal availability of alcohol on its consumption and related harms: A critical review in the  
648 context of UK licensing policies. *Drug Alcohol Rev.* 2014;33(5):515-525.  
649 doi:10.1111/dar.12191
- 650 6. Popova S, Giesbrecht N, Bekmuradov D, Patra J. Hours and days of sale and density of  
651 alcohol outlets: Impacts on alcohol consumption and damage: A systematic review. *Alcohol*  
652 *Alcohol.* 2009;44(5):500-516. doi:10.1093/alcalc/agg054
- 653 7. Campbell CA, Hahn RA, Elder R, et al. The Effectiveness of Limiting Alcohol Outlet Density  
654 As a Means of Reducing Excessive Alcohol Consumption and Alcohol-Related Harms. *Am J*  
655 *Prev Med.* 2009;37(6):556-569. doi:10.1016/j.amepre.2009.09.028
- 656 8. Picone GA, Sloan F, Trogdon JG. The effect of the tobacco settlement and smoking bans on  
657 alcohol consumption. *Health Econ.* 2004;13(10):1063-1080. doi:10.1002/hec.930
- 658 9. Sandoval JL, Leão T, Theler JM, et al. Alcohol control policies and socioeconomic  
659 inequalities in hazardous alcohol consumption: A 22-year cross-sectional study in a Swiss  
660 urban population. *BMJ Open.* 2019;9(5):e028971. doi:10.1136/bmjopen-2019-028971
- 661 10. Faeh D, Viswanathan B, Chiolero A, Warren W, Bovet P. Clustering of smoking, alcohol  
662 drinking and cannabis use in adolescents in a rapidly developing country. *BMC Public Health.*  
663 2006;6(1):169. doi:10.1186/1471-2458-6-169
- 664 11. Duncan DT, Rienti M, Kulldorff M, et al. Local spatial clustering in youths' use of tobacco,  
665 alcohol, and marijuana in Boston. *Am J Drug Alcohol Abuse.* 2016;42(4):412-421.  
666 doi:10.3109/00952990.2016.1151522
- 667 12. Assanangkornchai S, Li J, McNeil E, Saingam D. Clusters of alcohol and drug use and other  
668 health-risk behaviors among Thai secondary school students: A latent class analysis. *BMC*  
669 *Public Health.* 2018;18(1):1272. doi:10.1186/s12889-018-6205-z
- 670 13. Gruenewald PJ, Remer LG, Lascala EA. Testing a social ecological model of alcohol use: The  
671 California 50-city study. *Addiction.* 2014;109(5):736-745. doi:10.1111/add.12438
- 672 14. Bryden A, Roberts B, McKee M, Petticrew M. A systematic review of the influence on alcohol  
673 use of community level availability and marketing of alcohol. *Heal Place.* 2012;18(2):349-  
674 357. doi:10.1016/j.healthplace.2011.11.003
- 675 15. Bryden A, Roberts B, Petticrew M, McKee M. A systematic review of the influence of  
676 community level social factors on alcohol use. *Heal Place.* 2013;21:70-85.  
677 doi:10.1016/j.healthplace.2013.01.012
- 678 16. Collins SE. Associations between socioeconomic factors and alcohol outcomes. *Alcohol Res*  
679 *Curr Rev.* 2016;38(1):83-94.

- 680 17. Sherk A, Stockwell T, Chikritzhs T, et al. Alcohol consumption and the physical availability  
681 of take-away alcohol: Systematic reviews and meta-analyses of the days and hours of sale and  
682 outlet density. *J Stud Alcohol Drugs*. 2018;79(1):58-67. doi:10.15288/jsad.2018.79.58
- 683 18. Chaix B, Merlo J, Chauvin P. Comparison of a spatial approach with the multilevel approach  
684 for investigating place effects on health: The example of healthcare utilisation in France. *J*  
685 *Epidemiol Community Health*. 2005;59(6):517-526. doi:10.1136/jech.2004.025478
- 686 19. Guessous I, Bochud M, Theler JM, Gaspoz JM, Pechère-Bertschi A. 1999-2009 trends in  
687 prevalence, unawareness, treatment and control of hypertension in Geneva, Switzerland.  
688 Barengo NC, ed. *PLoS One*. 2012;7(6):e39877. doi:10.1371/journal.pone.0039877
- 689 20. Morabia A, Bernstein M, Héritier S, Ylli A. Community-based surveillance of cardiovascular  
690 risk factors in Geneva: Methods, resulting distributions, and comparisons with other  
691 populations. *Prev Med (Baltim)*. 1997;26(3):311-319. doi:10.1006/pmed.1997.0146
- 692 21. Openshaw S. *The Modifiable Areal Unit Problem*. Vol 38. Geo Books; 1983.
- 693 22. Morabia A, Bernstein M, Kumanyika S, et al. Développement et validation d'un questionnaire  
694 alimentaire semi-quantitatif à partir d'une enquête de population. *Sozial- und Präventivmedizin*  
695 *SPM*. 1994;39(6):345-369. doi:10.1007/BF01299666
- 696 23. Mozaffarian D, Fahimi S, Singh GM, et al. Global Sodium Consumption and Death from  
697 Cardiovascular Causes. *N Engl J Med*. 2014;371(7):624-634. doi:10.1056/nejmoa1304127
- 698 24. Micha R, Khatibzadeh S, Shi P, et al. Global, regional, and national consumption levels of  
699 dietary fats and oils in 1990 and 2010: A systematic analysis including 266 country-specific  
700 nutrition surveys. *BMJ*. 2014;348. doi:10.1136/bmj.g2272
- 701 25. REG. Accessed January 7, 2021. [https://www.ge.ch/utiliser-repertoire-entreprises-](https://www.ge.ch/utiliser-repertoire-entreprises-reg/consulter-reg)  
702 [reg/consulter-reg](https://www.ge.ch/utiliser-repertoire-entreprises-reg/consulter-reg)
- 703 26. SITG. Catalogue | SITG. Accessed January 7, 2021.  
704 [https://ge.ch/sitg/sitg\\_catalog/sitg\\_donnees](https://ge.ch/sitg/sitg_catalog/sitg_donnees)
- 705 27. Boeing G. OSMnx: New methods for acquiring, constructing, analyzing, and visualizing  
706 complex street networks. *Comput Environ Urban Syst*. 2017;65:126-139.  
707 doi:10.1016/j.compenvurbsys.2017.05.004
- 708 28. Foti F, Waddell P, Luxen D. *A Generalized Computational Framework for Accessibility* □:  
709 *From the Pedestrian to the Metropolitan Scale.*; 2012.
- 710 29. Buehler R, Pucher J, Merom D, Bauman A. Active travel in Germany and the U.S.:  
711 Contributions of daily walking and cycling to physical activity. *Am J Prev Med*.  
712 2011;41(3):241-250. doi:10.1016/j.amepre.2011.04.012
- 713 30. Auchincloss AH, Gebreab SY, Mair C, Diez Roux A V. A review of spatial methods in  
714 epidemiology, 2000-2010. *Annu Rev Public Health*. 2012;33(1):107-122.  
715 doi:10.1146/annurev-publhealth-031811-124655
- 716 31. Oshan TM, Li Z, Kang W, Wolf LJ, Stewart Fotheringham A. MGWR: A python  
717 implementation of multiscale geographically weighted regression for investigating process  
718 spatial heterogeneity and scale. *ISPRS Int J Geo-Information*. 2019;8(6).  
719 doi:10.3390/ijgi8060269
- 720 32. Chen DR, Truong K. Using multilevel modeling and geographically weighted regression to  
721 identify spatial variations in the relationship between place-level disadvantages and obesity in  
722 Taiwan. *Appl Geogr*. 2012;32(2):737-745. doi:10.1016/j.apgeog.2011.07.018



- 723 33. Chi SH, Grigsby-Toussaint DS, Bradford N, Choi J. Can Geographically Weighted Regression  
724 improve our contextual understanding of obesity in the US? Findings from the USDA Food  
725 Atlas. *Appl Geogr*. 2013;44:134-142. doi:10.1016/j.apgeog.2013.07.017
- 726 34. Oshan TM, Smith JP, Fotheringham AS. Targeting the spatial context of obesity determinants  
727 via multiscale geographically weighted regression. *Int J Health Geogr*. 2020;19(1):11.  
728 doi:10.1186/s12942-020-00204-6
- 729 35. Diggle P. *Applied Spatial Statistics for Public Health Data*. Vol 100. John Wiley & Sons, Inc.;  
730 2005. doi:10.1198/jasa.2005.s15
- 731 36. Anselin L. Local Indicators of Spatial Association—LISA. *Geogr Anal*. 1995;27(2):93-115.  
732 doi:10.1111/j.1538-4632.1995.tb00338.x
- 733 37. Consommation d'alcool à risque. Accessed May 4, 2021.  
734 [https://www.bag.admin.ch/bag/fr/home/gesund-leben/sucht-und-](https://www.bag.admin.ch/bag/fr/home/gesund-leben/sucht-und-gesundheit/alkohol/problemkonsum.html)  
735 [gesundheit/alkohol/problemkonsum.html](https://www.bag.admin.ch/bag/fr/home/gesund-leben/sucht-und-gesundheit/alkohol/problemkonsum.html)
- 736 38. Tatem AJ. Innovation to impact in spatial epidemiology. *BMC Med*. 2018;16(1):209.  
737 doi:10.1186/s12916-018-1205-5
- 738 39. Fu SH, Jha P, Gupta PC, Kumar R, Dikshit R, Sinha D. Geospatial analysis on the  
739 distributions of tobacco smoking and alcohol drinking in India. *PLoS One*. 2014;9(7).  
740 doi:10.1371/journal.pone.0102416
- 741 40. Guessous I, Joost S, Jeannot E, Theler JM, Mahler P, Gaspoz JM. A comparison of the spatial  
742 dependence of body mass index among adults and children in a Swiss general population. *Nutr*  
743 *Diabetes*. 2014;4(3):e111-e111. doi:10.1038/nutd.2014.8
- 744 41. Joost S, De Ridder D, Marques-Vidal P, et al. Overlapping spatial clusters of sugar-sweetened  
745 beverage intake and body mass index in Geneva state, Switzerland. *Nutr Diabetes*.  
746 2019;9(1):1-10. doi:10.1038/s41387-019-0102-0
- 747 42. De Ridder D, Belle FN, Marques-Vidal P, et al. Geospatial analysis of sodium and potassium  
748 intake: A swiss population-based study. *Nutrients*. 2021;13(6):1798.  
749 doi:10.3390/nu13061798
- 750 43. Huang GC, Soto D, Fujimoto K, Valente TW. The interplay of friendship networks and social  
751 networking sites: Longitudinal analysis of selection and influence effects on adolescent  
752 smoking and alcohol use. *Am J Public Health*. 2014;104(8). doi:10.2105/AJPH.2014.302038
- 753 44. Lo CC, Weber J, Cheng TC. A spatial analysis of student binge drinking, alcohol-outlet  
754 density, and social disadvantages. *Am J Addict*. 2013;22(4):391-401. doi:10.1111/j.1521-  
755 0391.2013.12022.x
- 756 45. Zhu L, Gorman DM, Horel S. Alcohol outlet density and violence: A geospatial analysis.  
757 *Alcohol Alcohol*. 2004;39(4):369-375. doi:10.1093/alcalc/agh062
- 758 46. Ying YH, Wu CC, Chang K. The effectiveness of drinking and driving policies for different  
759 alcohol-related fatalities: A quantile regression analysis. *Int J Environ Res Public Health*.  
760 2013;10(10):4628-4644. doi:10.3390/ijerph10104628
- 761
